# Supplementary material for: Supramolecular architectures of novel chromium(iii) oxalate complexes: steric effects of the ligand size and building-blocks approach
Source: Royal Society of Chemistry journal article supplement (doi:10.1039/c2dt32249h), 2012-01-01
Supplement: c2dt32249h.pdf [file c2dt32249h.pdf]

## Electronic Supplementary Information (ESI)

### Supramolecular architectures of novel chromium(III) oxalate complexes: steric effects of the ligand size and building-blocks approach

Lidija Androš, Marijana Jurić,\* Krešimir Molčanov and Pavica Planinić\*

*Ruđer Bošković Institute, Bijenička cesta 54, 10000 Zagreb, Croatia.*

*E-mail: [Marijana.Juric@irb.hr](mailto:Marijana.Juric@irb.hr) and [planinic@irb.hr](mailto:planinic@irb.hr)*

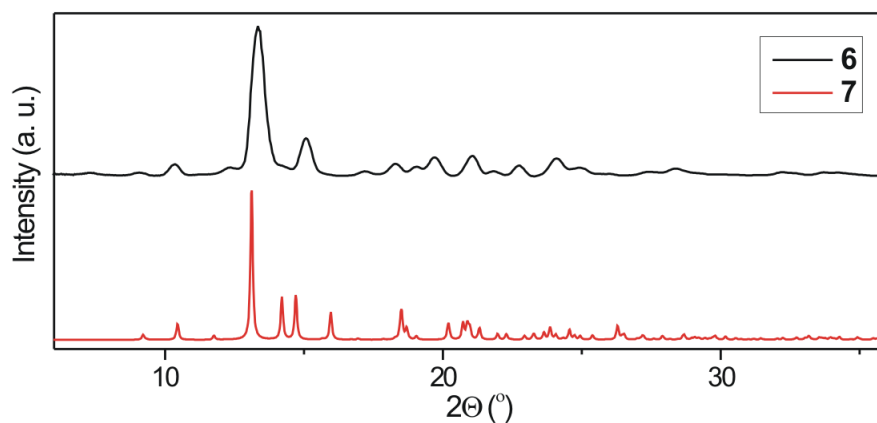

**Fig. S1** The X-ray powder diffraction patterns of **6** and **7**. The pattern of **7** is simulated from its single crystal diffraction data.

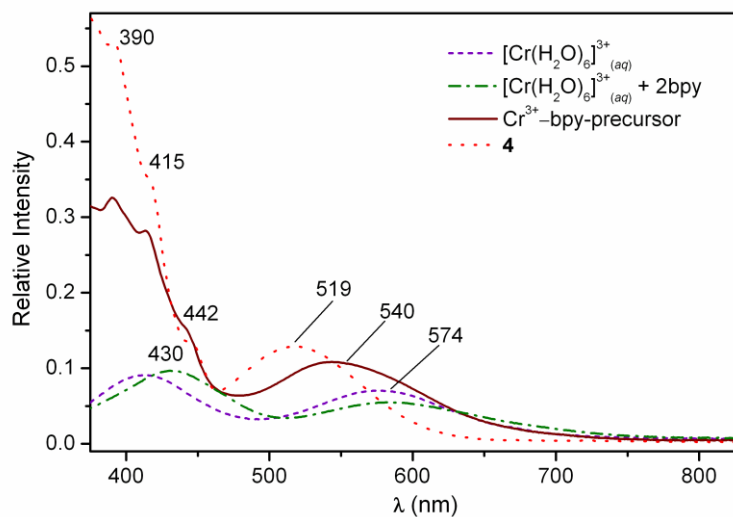

**Fig. S2** Electronic spectra demonstrating the changes in the coordination sphere of chromium(III) ions during the procedure of synthesis of compound **4**. The Cr<sup>3+</sup>-precursor complex is formed after the solution containing Cr<sup>3+</sup> and bpy was refluxed in the microwave reactor.
